# Supplementary material for: Rapid and Efficient Extraction of Cell-Free DNA Using Homobifunctional Crosslinkers
Source: MDPI journal article supplement (doi:10.3390/biomedicines10081883), 2022-08-04
Supplement: s1 [file s1]

Article

# Rapid and Efficient Extraction of Cell-free DNA Using Homobifunctional Crosslinkers

HyeonAh Seong <sup>1+</sup>, Junsoo Park <sup>2+</sup>, Minju Bae <sup>1</sup> and Sehyun Shin <sup>1,2,3\*</sup>

<sup>1</sup> School of Mechanical engineering, Korea University, Seoul, Korea

<sup>2</sup> Department of Micro-Nano engineering, Korea University, Seoul, Korea

<sup>3</sup> Engineering Research Center for Biofluid Biopsy, Seoul, Korea

\* Correspondence: [lexerdshin@korea.ac.kr](mailto:lexerdshin@korea.ac.kr); Tel.: +82-10-4506-2825

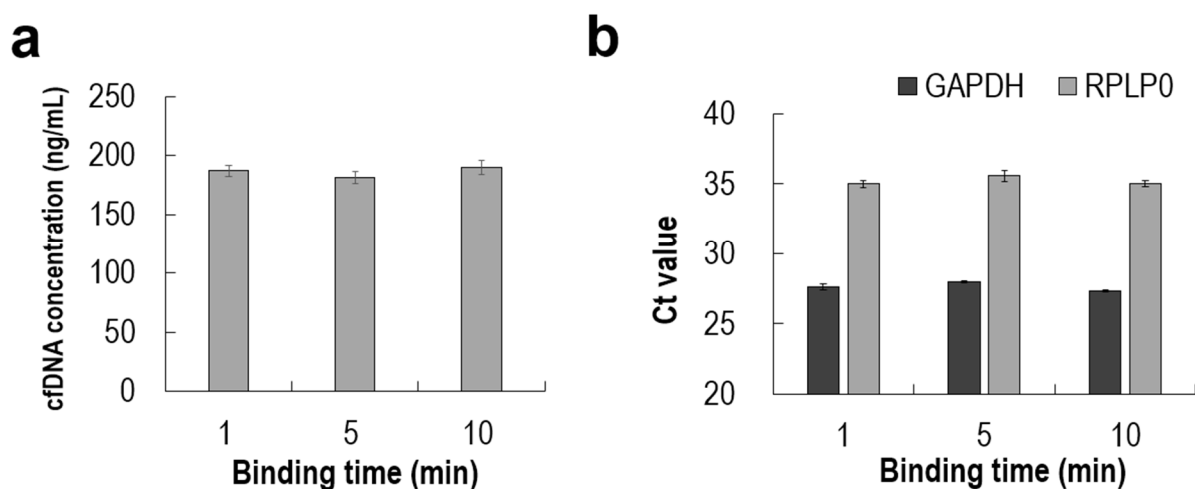

**Figure S1 Comparison of cfDNA extraction with varying DMS-DNA binding time.** a) Effect of DMS-DNA binding time on cfDNA recovery. b) Effect of DMS-DNA binding time on cycle threshold of PCR.

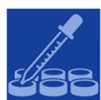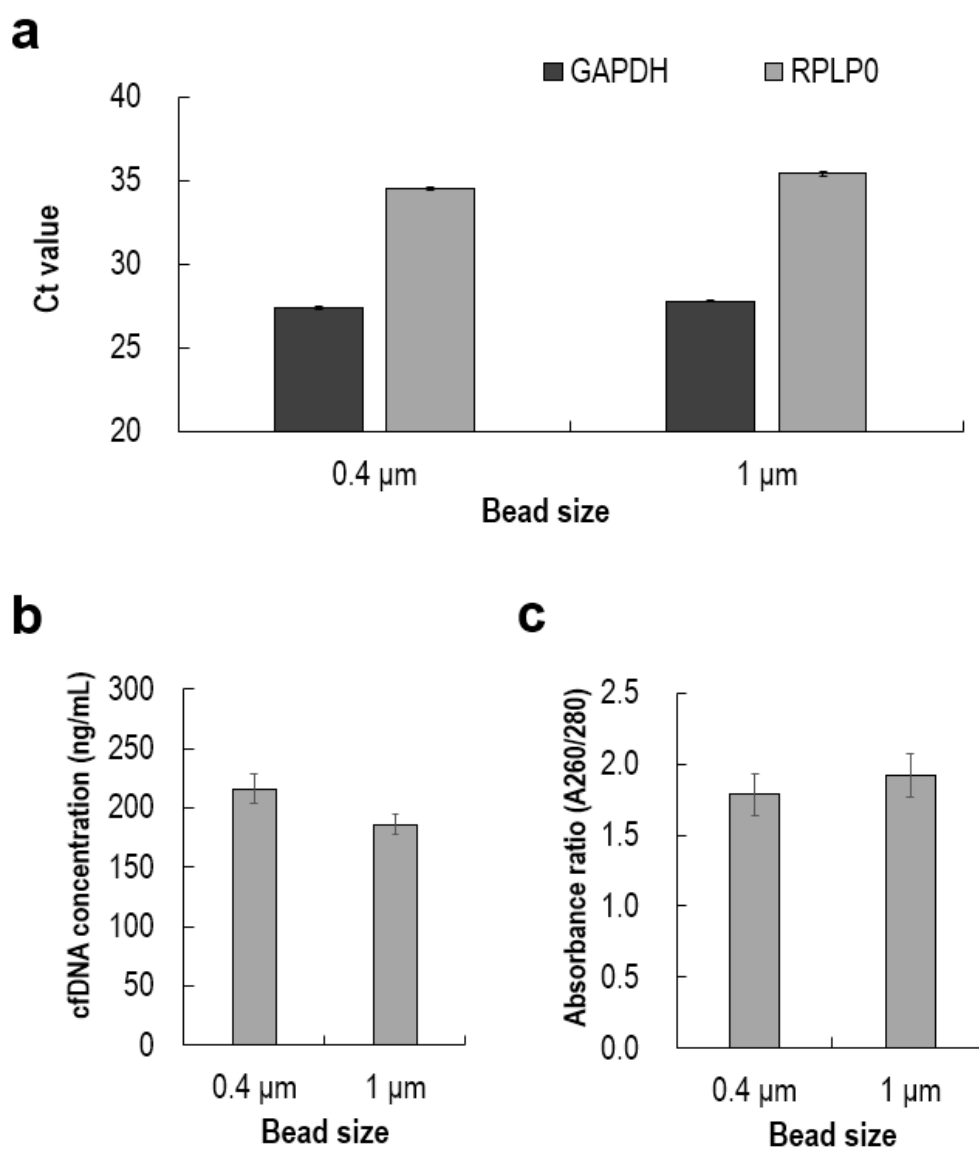

**Figure S2 Comparison of cfDNA extraction performance with two different bead sizes.** a) Effect of bead size on cycle threshold of PCR. b) Effect of bead size on cfDNA concentration. c) Effect of bead size on cfDNA purity ratio.
